# Supplementary figures and images for: A Comparison Study of Antiultraviolet and Sustained Release Properties of Polydopamine/Avermectin Microcapsule and Microsphere
Source: Hindawi journal article supplement (doi:10.1155/2018/7584281), 2018-12-30

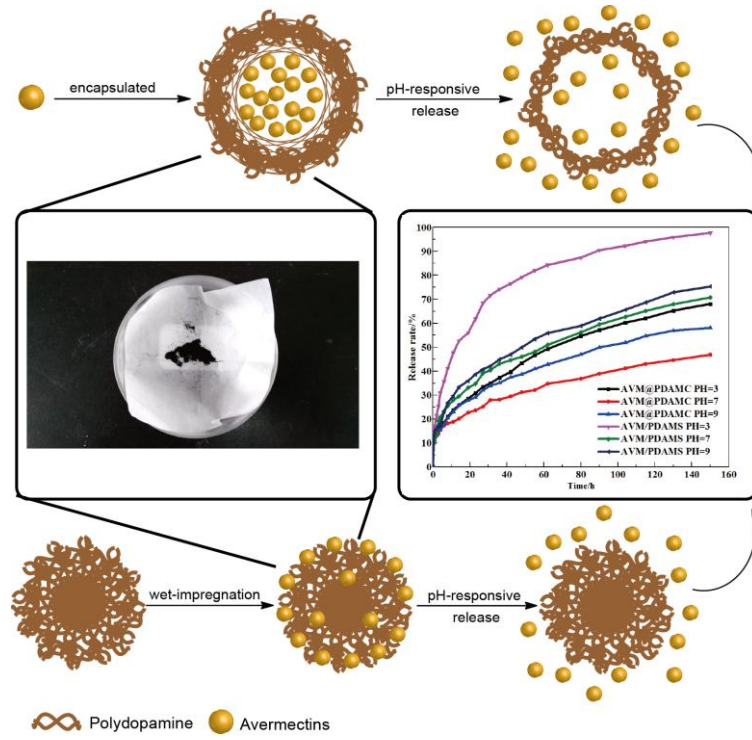

**Graphical Abstract**

Supplement: f1 [file 7584281.f1.pdf]
